# Supplementary material for: Open science challenges, benefits and tips in early career and beyond
Source: PLoS Biol. 2019 May 1;17(5):e3000246. doi: 10.1371/journal.pbio.3000246 (PMC6513108; doi:10.1371/journal.pbio.3000246)
Supplement: S1 Data — RR, registered report. (XLSX) [file pbio.3000246.s002.xlsx]

## Sheet: Sheet1
Authors	Publication title	# null results non-replication	# non-null results non-replication	# null results replication	# non-null results replication	Excluded
Tipples and Pecchinenda	A closer look at the size of the gaze-liking effect: a prere…	1	0	1	0	0
Moon and Roeder	A Secondary Replication Attempt of Stereotype Susceptibility…	2	0	2	0	0
Brindley et al.	An evolutionary perspective on intergroup dating bias	4	1	0	0	0
Genschow et al.	Anticipating actions and corticospinal excitability: A prere…	1	0	0	0	0
Grubb and Li	Assessing the role of accuracy-based feedback in value-drive…	1	0	0	1	0
Ertimur et al.	Bridging the Gap: Evidence from Externally Hired CEOs	3	3	0	0	0
Burger and Bless	Cognitive consequences of formal clothing: the effects of cl…	2	0	0	0	0
Hail et al.	Corporate Scandals and Regulation <sup>*</sup>	N/A	N/A	N/A	N/A	1
Bigler et al.	Cortical thickness in pediatric mild traumatic brain injury …	N/A	N/A	N/A	N/A	1
Dwyer et al.	Cousins or conjoined twins: how different are meaning and ha…	2	0	0	0	0
Allee et al.	Disclosure “Scriptability”	1	1	0	0	0
Ernst et al.	Do Researchers Anchor their Beliefs on the Outcome of an Ini…	2	0	0	0	0
Samur et al.	Does a single session of reading literary fiction prime enha…	0	0	4	0	0
Chopik	Does personality change following spousal bereavement?	0	0	1	0	0
Jackson et al.	Does that pose become you? Testing the effect of body postur…	0	0	1	1	0
McCarthy	Due diligence: revisiting the heat–aggression association hy…	N/A	N/A	N/A	N/A	1
Li and Sandino	Effects of an Information Sharing System on Employee Creativ…	3	0	0	0	0
Parrish et al.	Exploring decoy effects on computerized task preferences in …	N/A	N/A	N/A	N/A	1
Frenken and Berti	Exploring the switching of the focus of attention within wor…	0	1	2	0	0
Radel et al.	Extending the limits of force endurance: Stimulation of the …	1	0	0	0	0
Guo et al.	Global network centrality of university rankings	0	1	0	0	0
Berndsen et al.	Glorifying national identification increases schadenfreude a…	0	2	0	0	0
Chapman et al.	How robust is familiar face recognition? A repeat detection …	1	2	0	0	0
Campbell et al.	Impairment of manual but not saccadic response inhibition fo…	3	1	0	0	0
Klein et al.	Investigating Variation in Replicability: A “Many Labs” Repl…	0	0	3	10	0
Bernard et al.	Investor Behavior and the Benefits of Direct Stock Ownership…	2	0	0	0	0
Wardecker et al.	Is narcissism associated with baseline cortisol in men and w…	0	0	1	0	0
Magee et al.	Is personality variability associated with adjustment?	0	0	1	0	0
Goldberg and Carmichael	Language complexity, belief-consistency, and the evaluation …	1	5	0	0	0
Chandler	Likeableness and meaningfulness ratings of 555 (+487) person…	0	0	0	1	0
Keller et al.	Meeting your inner super(wo)man: are power poses effective w…	0	0	2	0	0
Sachisthal et al.	Mimicry of ingroup and outgroup emotional expressions	0	0	1	0	0
Tibboel	Mood effects on attentional control: a preregistered replica…	0	0	1	0	0
Morgan‐Short et al.	Multisite Replication in Second Language Acquisition Researc…	N/A	N/A	N/A	N/A	1
Heycke et al.	Of two minds or one? A registered replication of Rydell et a…	0	0	4	0	0
Kuppuraj et al.	Online incidental statistical learning of audiovisual word s…	1	2	0	0	0
Eyring and Narayanan	Performance Effects of Setting a High Reference Point for Pe…	0	3	0	0	0
Allen et al.	Personality and the subjective experience of body mass in Au…	N/A	N/A	N/A	N/A	1
Latu et al.	Power vs. persuasion: can open body postures embody openness…	0	0	2	0	0
Lumian and McRae	Preregistered Replication of “Affective Flexibility: Evaluat…	0	0	0	1	0
Blini et al.	Probing the role of the vestibular system in motivation and …	0	1	0	0	0
Lightner et al.	Radical framing effects in the ultimatum game: the impact of…	1	1	0	0	0
Bombari et al.	Real and imagined power poses: is the physical experience ne…	0	0	1	1	0
Bouwmeester et al.	Registered Replication Report: Rand, Greene, and Nowak (2012…	1	0	1	0	0
Wagenmakers et al.	Registered Replication Report: Strack, Martin, & Stepper (19…	0	0	1	0	0
Cheung et al.	Registered Replication Report: Study 1 From Finkel, Rusbult,…	0	0	1	0	0
Kvetnaya	Registered Replication Report: Testing Disruptive Effects of…	0	0	1	0	0
Shan et al.	Replication study: androgen receptor splice variants determi…	0	0	1	0	0
Repass and Biology	Replication Study: Fusobacterium nucleatum infection is prev…	0	0	1	0	0
Shan et al.	Replication Study: Inhibition of BET recruitment to chromati…	0	0	1	2	0
Vanden Heuvel et al.	Replication Study: Systematic identification of genomic mark…	0	0	3	0	0
Showalter et al.	Replication Study: The common feature of leukemia-associated…	0	0	0	3	0
Lewis et al.	Replication Study: Transcriptional amplification in tumor ce…	0	0	1	1	0
Zopf et al.	Representing the location of manipulable objects in shape-se…	1	1	0	0	0
Campbell et al.	Self-esteem, relationship threat, and dependency regulation:…	0	0	1	0	0
Schlegel et al.	Sense and sensibility: The role of cognitive and emotional i…	N/A	N/A	N/A	N/A	1
South et al.	Sex Differences in the Big Five Model Personality Traits: A …	N/A	N/A	N/A	N/A	1
Eastwick and Smith	Sex-Differentiated Effects of Physical Attractiveness on Rom…	0	1	0	0	0
1	Subliminal influence on preferences? A test of evaluative co…	1	0	0	0	0
Teige-Mocigemba et al.	The Affect Misattribution Procedure: In Search of Prejudice …	0	1	0	0	0
Chetail et al.	The consonant/vowel pattern determines the structure of orth…	0	2	0	0	0
Bell et al.	The Effect of Cognitive Control on Different Types of Audito…	0	2	0	0	0
Soliman et al.	The Impact of Immersive Technology on Nature Relatedness and…	3	1	0	0	0
Elleman et al.	The personality of U.S. states: Stability from 1999 to 2015	N/A	N/A	N/A	N/A	1
Weston and Jackson	The role of vigilance in the relationship between neuroticis…	1	1	0	0	0
Duin et al.	The Tone from above: The Effect of Communicating a Supportiv…	2	1	0	0	0
Nevarez et al.	Thriving in midlife: The roles of childhood nurturance and a…	0	2	0	0	0
Ivory et al.	Video Game Use as Risk Exposure, Protective Incapacitation, or …	1	4	0	0	0
Arpin et al.	When “We” or “They” exclude others: attributing and evaluati…	1	0	0	0	0
Hagger et al.	A Multilab Preregistered Replication of the Ego-Depletion Ef…	0	0	1	0	0
Gibson et al.	A Replication Attempt of Stereotype Susceptibility (Shih, Pi…	0	0	0	1	0
Dutilh et al.	A test of the diffusion model explanation for the worst perf…	2	1	1	0	0
Huff and Kruszewska	Banners, Barricades, and Bombs: The Tactical Choices of Soci…	N/A	N/A	N/A	N/A	1
Vermeulen et al.	Breakthrough or One-Hit Wonder?: Three Attempts to Replicate…	2	1	1	0	0
Hidalgo et al.	Can Politicians Police Themselves? Natural Experimental Evid…	N/A	N/A	N/A	N/A	1
Voorspoels et al.	Can race really be erased? A pre-registered replication stud…	0	0	0	2	0
Schouppe et al.	Conscious and unconscious context-specific cognitive control	N/A	N/A	N/A	N/A	1
Steegen et al.	Corrigendum: Measuring the crowd within again: a pre-registe…	N/A	N/A	N/A	N/A	1
Bailey et al.	Could a woman be superman? Gender and the embodiment of powe…	1	0	1	0	0
Johnson et al.	Does Cleanliness Influence Moral Judgments?: A Direct Replic…	0	0	2	0	0
Gianelli and Dalla Volta	Does listening to action-related sentences modulate the acti…	N/A	N/A	N/A	N/A	1
Brandt et al.	Does Recalling Moral Behavior Change the Perception of Brigh…	1	0	4	0	0
Whillans et al.	Does volunteering improve well-being?	1	0	0	0	0
Breuer et al.	Drive the Lane; Together, Hard!”: An Examination of the Eff…	0	5	0	0	0
van der Zee et al.	Effects of Subtitles, Complexity, and Language Proficiency o…	1	0	0	0	0
Ronay et al.	Embodied power, testosterone, and overconfidence as a causal…	1	0	1	0	0
Klauer et al.	Evaluative Priming in the Pronunciation Task: A Preregistere…	2	0	1	0	0
Nauts et al.	Forming Impressions of Personality	0	0	1	0	0
Steinemann et al.	Interactive Narratives Affecting Social Change: A Closer Loo…	5	2	0	0	0
Ong et al.	Is comfort food really good for the soul? A replication of T…	0	0	1	0	0
Verkoeijen and Bouwmeester	Is spacing really the “friend of induction”?	0	0	0	1	0
Steegen et al.	Measuring the crowd within again: a pre-registered replicati…	0	0	0	2	0
Hobson and Bishop	Mu suppression – A good measure of the human mirror neuron s…	0	0	1	0	0
Vetter and Kutzner	Nudge me if you can - how defaults and attitude strength int…	2	2	0	2	0
Zanolie and Pecher	Number-induced shifts in spatial attention: a replication st…	0	0	5	1	0
Rotteveel et al.	On the automatic link between affect and tendencies to appro…	0	0	4	0	0
Rowland et al.	On the reliability of retrieval-induced forgetting	0	0	1	2	0
Eerland et al.	Registered Replication Report: Hart & Albarracín (2011)	0	0	2	0	0
Alogna et al.	Registered Replication Report: Schooler and Engstler-Schoole…	0	4	0	0	0
Lynott et al.	Replication of “Experiencing Physical Warmth Promotes Interp…	0	0	1	0	0
Žeželj and Jokić	Replication of Experiments Evaluating Impact of Psychologica…	0	0	4	0	0
Calin-Jageman and Caldwell	Replication of the Superstition and Performance Study by Dam…	0	0	2	0	0
Aird et al.	Replication Study: BET bromodomain inhibition as a therapeut…	0	0	0	1	0
Mantis et al.	Replication Study: Coadministration of a tumor-penetrating p…	0	0	4	0	0
Kandela et al.	Replication Study: Discovery and preclinical validation of d…	0	0	3	0	0
Horrigan et al.	Replication Study: Melanoma genome sequencing reveals freque…	0	0	4	3	0
Horrigan and Biology	Replication Study: The CD47-signal regulatory protein alpha …	0	0	1	1	0
Zickfeld and Schubert	Revisiting and extending a response latency measure of inclu…	0	2	0	2	0
Wesselmann et al.	Revisiting Schachter’s Research on Rejection, Deviance, and …	1	0	1	2	0
Sinclair et al.	Revisiting the Romeo and Juliet Effect (Driscoll, Davis, & L…	0	0	1	0	0
Evers and Lakens	Revisiting Tversky's diagnosticity principle	0	0	1	3	0
Geng and Schnur	Role of features and categories in the organization of objec…	4	0	0	0	0
IJzerman et al.	Sex Differences in Distress From Infidelity in Early Adultho…	0	1	1	3	0
Wessler and Hansen	The effect of psychological distance on automatic goal conta…	2	0	0	0	0
Muthukumaraswamy et al.	The effects of AMPA blockade on the spectral profile of huma…	0	3	0	0	0
Bush et al.	The Effects of Authoritarian Iconography: An Experimental Te…	2	0	0	0	0
Ratner et al.	The effects of exposure to objective coherence on perceived …	0	0	5	0	0
Kopiske et al.	The functional subdivision of the visual brain: Is there a r…	0	0	0	5	0
Kowaleski et al.	The Impact of Consulting Services on Audit Quality: An Exper…	3	0	0	0	0
Sassenhagen and Bornkessel-Schlesewsky	The P600 as a correlate of ventral attention network reorien…	0	2	0	0	0
Blanken et al.	Three Attempts to Replicate the Moral Licensing Effect	0	0	3	0	0
Wagenmakers et al.	Turning the hands of time again: a purely confirmatory repli…	0	0	1	0	0
van ’t Veer et al.	Unconscious deception detection measured by finger skin temp…	1	0	0	0	0
Paris et al.	Using EEG and stimulus context to probe the modelling of aud…	1	0	0	0	0
Müller and Rothermund	What Does It Take to Activate Stereotypes? Simple Primes Don…	1	0	1	0	0
Coltheart et al.	Belief, delusion, hypnosis, and the right dorsolateral prefr…	0	1	1	0	0
Klaschinski et al.	Benefits of power posing: effects on dominance and social se…	2	1	1	0	0
